# Supplementary material
Source: PubMed Central journal article supplement (PMC11308561)
Supplement: mmc2.pdf [file mmc2.pdf]

## Supplemental Figure 2

### A

FNADO 2 weeks in culture

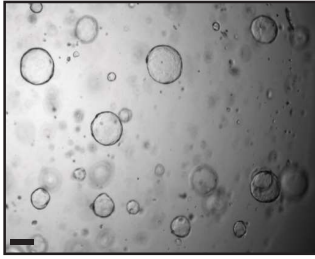

### B

| Gene | HGVSCoding                         | Exon | Coverage | Variant Frequency | Pathogenicity                | Type     | Copy Number Variation                                     |
|------|------------------------------------|------|----------|-------------------|------------------------------|----------|-----------------------------------------------------------|
| KRAS | NM_004985.3: c.35G>A, p.(Gly12Asp) | 2    | >2000    | 0,67              | Class 5 -clinical pathogenic | missense |                                                           |
| TP53 | NM_000546.5: c.586C>T, p.(Arg196*) | 6    | >2000    | 1                 | Class 5 -clinical pathogenic | nonsense | homozygous loss CDKN2A, heterozygous loss SMAD4, Myc gain |
